# Supplementary material for: High-performance SrNb0.1Co0.9−xFexO3−δperovskite cathodes for low-temperature solid oxide fuel cells
Source: Royal Society of Chemistry journal article supplement (doi:10.1039/c4ta03208j), 2014-01-01
Supplement: c4ta03208j1.pdf [file c4ta03208j1.pdf]

## Supporting Information

### High-performance $\text{SrNb}_{0.1}\text{Co}_{0.9-x}\text{Fe}_x\text{O}_{3-\delta}$ perovskite cathodes for low temperature solid oxide fuel cells

Yinlong Zhu, Jaka Sunarso, Wei Zhou\*, Shanshan Jiang, and Zongping Shao\*

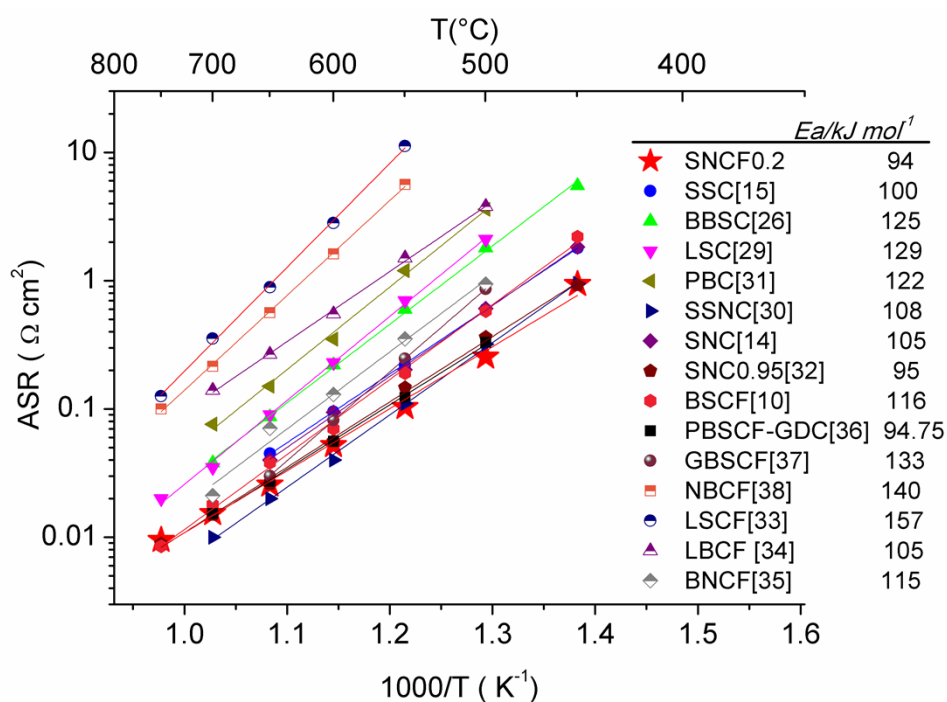

**Fig. S1** Performance mapping of area specific resistance (ASR) and activation energy ( $E_a$ ) of SNCF0.2 cathode against other high performance cathodes prepared under identical conditions. The cathode materials compared in this figure are cited in the paper.

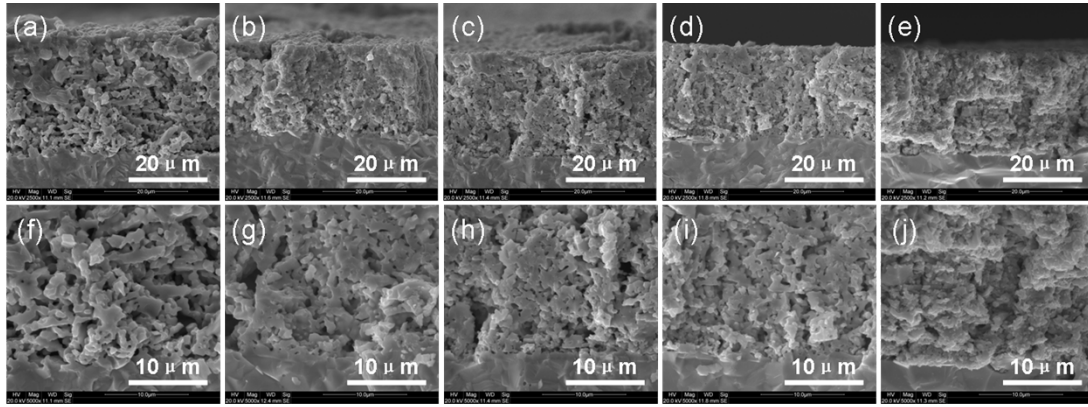

**Fig. S2** Additional SEM images of the cross-section of  $\text{SrNb}_{0.1}\text{Co}_{0.9-x}\text{Fe}_x\text{O}_{3-\delta}$  ( $0 \leq x \leq 0.5$ ) cathodes fired at 1000 °C for 2 h in air: (a, f)  $x=0$ , (b, g)  $x=0.1$ , (c, h)  $x=0.2$ , (d, i)  $x=0.3$ , (e, j)  $x=0.5$ .

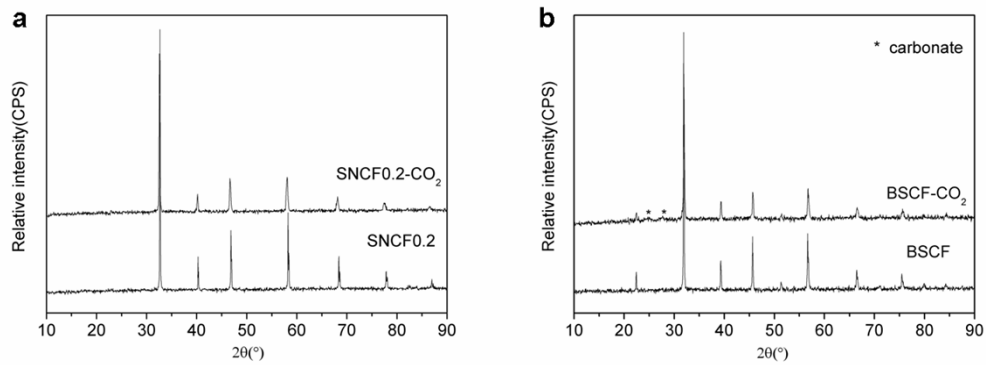

**Fig. S3** Powder x-ray diffraction patterns of (a) fresh SNCF0.2 and SNCF0.2 after CO<sub>2</sub> exposure, (b) BSCF and BSCF after CO<sub>2</sub> exposure for 1h at 600 °C.

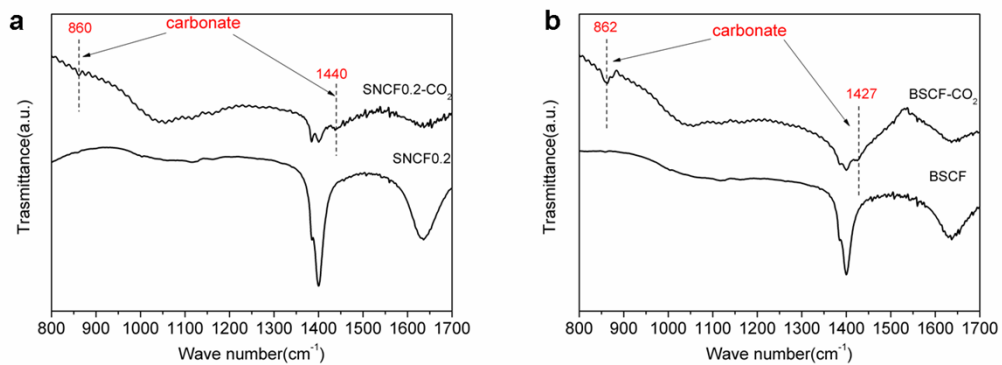

**Fig. S4** Fourier-Transform Infra-Red spectra of (a) fresh SNCF0.2 and SNCF0.2 after CO<sub>2</sub> exposure, (b) BSCF and BSCF after CO<sub>2</sub> exposure for 1h at 600 °C.
